# Supplementary material for: Setting the Social Monitoring Framework for Nature-Based Solutions Impact: Methodological Approach and Pre-Greening Measurements in the Case Study from CLEVER Cities Milan
Source: MDPI journal article supplement (doi:10.3390/su13179672), 2021-08-27
Supplement: s1 [file s1]

## **GREEN ROOFS AND WALLS FOR MILAN: PERCEPTIONS AND ENGAGEMENT**

Thank you for kindly participating in the **CLEVER Milan 2020** survey, as part of the **EU funded project CLEVER Cities** (<https://clevercities.eu>).

The questions you will be answering concern your neighbourhood, the building in which you live/work and the green roofs or walls that will be built there. We thank you also for participating in the Public Call of the Municipality of Milan for the construction of green roofs and walls in buildings.

The survey was elaborated by the Eliante, Ambiente Italia and POLIMI, partners in charge of data processing.

By responding to the questionnaire, you will help us to know better your thoughts and your perceptions. Due to the current situation with COVID-19, we opted for an online questionnaire.

This questionnaire is completely anonymous, and no personal data will be collected. The questionnaire should take around 15 to 20 minutes to fill-in

If you want to get more information, you can visit our website [www.milanoclever.net](http://www.milanoclever.net). And, if you are interested in our activities, we invite you to follow the project updates by subscribing to the CLEVER Cities Milan mailing list: <https://mailchi.mp/82648a63663c/clevermailinglist>

## THE BUILDING\* obligatory question

1) Select the building address where you live/ work/ visit

- ☐ Via Bronzetti 5
- ☐ Via Giambellino 121
- ☐ Corso Genova 20
- ☐ Corso Lodi 34
- ☐ Via Orsini 68
- ☐ Via Ponti 17
- ☐ Via Russoli 18

## PERSONAL DATA

2) Indicate gender

- ☐ Female
- ☐ Male
- ☐ Other
- ☐ I prefer not to answer

3) Age range

- ☐ 16-24
- ☐ 25-34
- ☐ 35-49
- ☐ 50-64
- ☐ 65-79
- ☐ I prefer not to answer

4) Do you have children? In which age range?

- ☐ No children
- ☐ 0-5 years
- ☐ 5-10 years
- ☐ 10-13 years
- ☐ 13-18 years
- ☐ Over 18 years old

5) About your employment status, you are currently:

- ☐ Unemployed
- ☐ Employee or self-employed/ freelancer without employees
- ☐ Self-employed with employees
- ☐ Not working / retired
- ☐ Household
- ☐ Not working – disability or long-term sick leave

- ☐ Student (full-time or part-time)
- ☐ I prefer not to answer
- ☐

#### 6) Highest level of education obtained

- ☐ PhD. / Master
- ☐ University degree / Bachelor
- ☐ High School Diploma
- ☐ Middle School
- ☐ Elementary School
- ☐ No educational qualification
- ☐ I prefer not to answer

### THE BUILDING

In this section, we would like to learn about your perceptions in relation to the building on which the green roof/wall will be built. Your answers must refer to the pre-emergency COVID-19 period.

#### 7) What is your connection to the building where the green roof/wall will be built?

*You can choose multiple answers*

- ☐ I live in the building
- ☐ I visit the building for personal reasons (family, friends, ...)
- ☐ I work in the building
- ☐ I visit studios/ shops/ offices in the building
- ☐ I take care for the elderly or children who live in the building
- ☐ Other (*please specify*): .....

#### 8) How strongly do you feel about your sense of belonging to this building?

- ☐ Very strongly
- ☐ Fairly strong
- ☐ Neutral/ moderate
- ☐ Not very strong
- ☐ Not at all

#### 9) Approximately, how long have you lived/ worked/ visited the building?

- ☐ Less than 6 months
- ☐ Less than 1 year
- ☐ Less than 5 years
- ☐ More than 5 years

#### 10) In the last year, before the COVID-19 emergency, how often did you visit the building?

- ☐ Every day (even several times a day - once or more times)
- ☐ Weekly

- ☐ Monthly
- ☐ Occasionally /Sporadically
- ☐ Never

11)How often do you chat with people who live in the building, apart from greeting them?

- ☐ Every day (several times a day)
- ☐ Weekly
- ☐ Monthly
- ☐ Occasionally
- ☐ Never

12)How often it happens for you to carry out activities in collaboration with people who live in the building?

- ☐ Every day (several times a day)
- ☐ Weekly
- ☐ Monthly
- ☐ Occasionally
- ☐ Never

13)Regarding your relationship with the people living/ working in the building, to what extent do you agree or disagree with the following statements?

|                                                              | Strongly disagree     | Disagree              | Neither agree nor disagree | Agree                 | Strongly agree        | I don't know/ I prefer not to answer |
|--------------------------------------------------------------|-----------------------|-----------------------|----------------------------|-----------------------|-----------------------|--------------------------------------|
| I exchange favours and things with the residents             | <input type="radio"/> | <input type="radio"/> | <input type="radio"/>      | <input type="radio"/> | <input type="radio"/> | <input type="radio"/>                |
| I can trust the residents                                    | <input type="radio"/> | <input type="radio"/> | <input type="radio"/>      | <input type="radio"/> | <input type="radio"/> | <input type="radio"/>                |
| Residents generally do not get along with each other         | <input type="radio"/> | <input type="radio"/> | <input type="radio"/>      | <input type="radio"/> | <input type="radio"/> | <input type="radio"/>                |
| The residents collaborate to improve the building conditions | <input type="radio"/> | <input type="radio"/> | <input type="radio"/>      | <input type="radio"/> | <input type="radio"/> | <input type="radio"/>                |
| I am happy with my friendships and relationships             | <input type="radio"/> | <input type="radio"/> | <input type="radio"/>      | <input type="radio"/> | <input type="radio"/> | <input type="radio"/>                |
| I plan to stay long in this building                         | <input type="radio"/> | <input type="radio"/> | <input type="radio"/>      | <input type="radio"/> | <input type="radio"/> | <input type="radio"/>                |

14)Overall, are you satisfied with the building?

- ☐ Completely dissatisfied

- ☐ Dissatisfied
- ☐ Neutral/ moderate satisfied
- ☐ Satisfied
- ☐ Very satisfied
- ☐ I don't know/ I prefer not to answer

15) How satisfied are you with the following characteristics of the building?

|                                | Extremely satisfied | Satisfied | Neutral/ moderate satisfied | Not satisfied | Not satisfied at all | I don't know/ I prefer not to answer |
|--------------------------------|---------------------|-----------|-----------------------------|---------------|----------------------|--------------------------------------|
| Acoustic isolation             |                     |           |                             |               |                      |                                      |
| Thermal comfort                |                     |           |                             |               |                      |                                      |
| Lighting                       |                     |           |                             |               |                      |                                      |
| Views                          |                     |           |                             |               |                      |                                      |
| Availability of common spaces  |                     |           |                             |               |                      |                                      |
| Quality of common spaces       |                     |           |                             |               |                      |                                      |
| Availability of green areas    |                     |           |                             |               |                      |                                      |
| Quality of green areas         |                     |           |                             |               |                      |                                      |
| Maintenance and cleaning       |                     |           |                             |               |                      |                                      |
| Proximity to parks and gardens |                     |           |                             |               |                      |                                      |

16) Would you support the creation of green shared spaces?

- ☐ Very supportive
- ☐ Supportive
- ☐ Neutral
- ☐ Not supportive
- ☐ Very against it
- ☐ I don't know/ I prefer not to answer

17) Why? \_\_\_\_\_

\_\_\_\_\_

THE GREEN URBAN AREAS

By green urban areas we mean gardens and public parks within the city

18) Do you have a terrace of a garden?

- ☐ Yes
- ☐ No

19) How important is greenery (green areas, trees, flowerbeds, etc...) in your life?

- ☐ Very important
- ☐ Important
- ☐ Indifferent
- ☐ Not very important
- ☐ It means nothing

20) To what extent do you agree or disagree with the following statements? I think urban greenery has a positive effect on...

|                                                                 | Strongly disagree     | Disagree              | Neither agree nor disagree | Agree                 | Strongly agree        | I don't know/ I prefer not to answer |
|-----------------------------------------------------------------|-----------------------|-----------------------|----------------------------|-----------------------|-----------------------|--------------------------------------|
| Presence of animals, plants of different species (biodiversity) | <input type="radio"/> | <input type="radio"/> | <input type="radio"/>      | <input type="radio"/> | <input type="radio"/> | <input type="radio"/>                |
| Air quality                                                     | <input type="radio"/> | <input type="radio"/> | <input type="radio"/>      | <input type="radio"/> | <input type="radio"/> | <input type="radio"/>                |
| Noise pollution                                                 | <input type="radio"/> | <input type="radio"/> | <input type="radio"/>      | <input type="radio"/> | <input type="radio"/> | <input type="radio"/>                |
| Perceived temperatures in summer and thermal comfort            | <input type="radio"/> | <input type="radio"/> | <input type="radio"/>      | <input type="radio"/> | <input type="radio"/> | <input type="radio"/>                |
| Aesthetics of neighbourhoods and buildings                      | <input type="radio"/> | <input type="radio"/> | <input type="radio"/>      | <input type="radio"/> | <input type="radio"/> | <input type="radio"/>                |
| Citizens wellbeing                                              | <input type="radio"/> | <input type="radio"/> | <input type="radio"/>      | <input type="radio"/> | <input type="radio"/> | <input type="radio"/>                |
| Citizens health                                                 | <input type="radio"/> | <input type="radio"/> | <input type="radio"/>      | <input type="radio"/> | <input type="radio"/> | <input type="radio"/>                |
| Social relationships between people and social cohesion         | <input type="radio"/> | <input type="radio"/> | <input type="radio"/>      | <input type="radio"/> | <input type="radio"/> | <input type="radio"/>                |
| Recreational, educational and cultural activities               | <input type="radio"/> | <input type="radio"/> | <input type="radio"/>      | <input type="radio"/> | <input type="radio"/> | <input type="radio"/>                |
| Relationship of citizens with nature                            | <input type="radio"/> | <input type="radio"/> | <input type="radio"/>      | <input type="radio"/> | <input type="radio"/> | <input type="radio"/>                |

21) In the last year, before the COVID-19 emergency, how often did you go to the green areas (urban parks, gardens, etc.) of the city?

*in the last spring/ summer*

- ☐ Every day (several times a day)
- ☐ Weekly
- ☐ Monthly
- ☐ Occasionally / sporadically
- ☐ Never

22) Are you satisfied with the green areas in your neighbourhood?

- ☐ Very satisfied  
☐ Satisfied  
☐ Neutral  
☐ Not satisfied  
☐ Very unsatisfied

23) Were you aware of CLEVER Cities before receiving this questionnaire?

- ☐ Yes  
☐ No

24) Do you know any innovative green solution proposed by CLEVER Cities project? If yes, which ones?

25) Do you know any other example of innovative green solutions in general? Which ones?

#### THE GREEN COVERS

By green covers we mean green roofs and walls

26) It happened to you to:

|                                                           | Yes | No |
|-----------------------------------------------------------|-----|----|
| Visit/ see a green roof/wall on buildings in other cities |     |    |
| Visit/ see a green roof/wall on buildings in Milan        |     |    |

27) Do you think green roofs/walls in Milan are:

|                                                                                | Strongly disagree | Disagree | Neither agree, nor disagree | Agree | Strongly agree | I don't know/ I prefer not to answer |
|--------------------------------------------------------------------------------|-------------------|----------|-----------------------------|-------|----------------|--------------------------------------|
| Innovative                                                                     |                   |          |                             |       |                |                                      |
| Still little known by professionals (architects, engineers, etc.)              |                   |          |                             |       |                |                                      |
| Not feasible due to the characteristics of the buildings                       |                   |          |                             |       |                |                                      |
| Suitable only for wealthy condominiums/ house associations                     |                   |          |                             |       |                |                                      |
| Useful to improve the city aesthetics                                          |                   |          |                             |       |                |                                      |
| Useful to reduce the environmental impact of the neighbourhood and in the city |                   |          |                             |       |                |                                      |

28) Do you think green roofs/walls of a building can have a positive impact on:

|                                                                       | Strongly disagree | Disagree | Neither agree, nor disagree | Agree | Strongly agree | I don't know/ I prefer not to answer |
|-----------------------------------------------------------------------|-------------------|----------|-----------------------------|-------|----------------|--------------------------------------|
| Energy saving for the building                                        |                   |          |                             |       |                |                                      |
| Reduction of summer heat peaks                                        |                   |          |                             |       |                |                                      |
| Rainwater collection and reuse                                        |                   |          |                             |       |                |                                      |
| Increase of greenery and biodiversity (variety of plants and animals) |                   |          |                             |       |                |                                      |
| Aesthetics of the building                                            |                   |          |                             |       |                |                                      |
| Relationships between neighbours within the building                  |                   |          |                             |       |                |                                      |
| Increased attractiveness of the neighbourhood                         |                   |          |                             |       |                |                                      |
| Increased home value                                                  |                   |          |                             |       |                |                                      |

29) Are you in favour or against the project for the construction of a green roof/wall in the building where you live?

- ☐ Strongly opposed
- ☐ Opposed
- ☐ Neutral
- ☐ Favourable
- ☐ Strongly favourable
- ☐ I don't know/ I prefer not to answer

If you are in favour, why?

If you are against it, why?

30) Would you be willing to pay more for a home that has any of these types of green coverage?

|                                 | Surely | I think so | Neutral | I think not | Certainly not | I don't know/ I prefer not to answer |
|---------------------------------|--------|------------|---------|-------------|---------------|--------------------------------------|
| Green roofs not liveable        |        |            |         |             |               |                                      |
| Liveable condominium green roof |        |            |         |             |               |                                      |
| Green wall and Living wall      |        |            |         |             |               |                                      |

31) To what extent do you agree or disagree with the following statements. The design of green roofs/walls presents the risk of ...:



|                                                            | Strongly disagree | Disagree | Neither agree, nor disagree | Agree | Strongly agree | I don't know/ I prefer not to answer |
|------------------------------------------------------------|-------------------|----------|-----------------------------|-------|----------------|--------------------------------------|
| Errors on the design that can cause leaks, cracks, etc.    |                   |          |                             |       |                |                                      |
| High maintenance costs                                     |                   |          |                             |       |                |                                      |
| Technical difficulties and problems in maintenance         |                   |          |                             |       |                |                                      |
| Bad management by condominiums                             |                   |          |                             |       |                |                                      |
| Poor safety and security for people living in the building |                   |          |                             |       |                |                                      |

32) How would you be interested in following and/or participating in the co-design, co-implementation/construction and/or co-management of the green roof/wall planned in the building?

|                                                                                                                                     | Interested | Not interested | I don't know |
|-------------------------------------------------------------------------------------------------------------------------------------|------------|----------------|--------------|
| I would like to be more informed about how the roof / wall will be built in the building where I live / work                        |            |                |              |
| I would be willing to collaborate in the co-management and co-maintenance of the green roof/ wall in the building where I live/work |            |                |              |

33) If there is something you want to add about the building, the green roofs/walls or other comments you want to point out, you can write here:

CLEVER Cities is a project that aims to experiment with nature-based solutions and innovative naturalistic solutions/green infrastructures in Milan, starting from the South area and then spreading them throughout the city and elsewhere. We want to make Milan a city that finds innovative solutions in nature to regenerate itself, face climate change and build its future with its citizens. We will carry out and promote, with

anyone interested, innovative nature-based solutions and interventions in neighbourhoods, buildings and infrastructures, so as to be the voice that demonstrates its feasibility and effectiveness and the tool that multiplies nature-based solutions (NBS) in Milan and in other cities.

CLEVER cities is a project co-financed by European funds for research and innovation (Horizon2020). The city of Milan participates together with London and Hamburg and other fellow cities. Check the website of the CLEVER Cities European project if you want to know in detail the activities in the field also in the other cities of the consortium (<https://clevercities.eu/>)
