# Supplementary material for: Setting the Social Monitoring Framework for Nature-Based Solutions Impact: Methodological Approach and Pre-Greening Measurements in the Case Study from CLEVER Cities Milan
Source: MDPI journal article supplement (doi:10.3390/su13179672), 2021-08-27
Supplement: s1 [file s1]

## The new Tibaldi Stop and green solutions: perceptions and involvement

### Clever Action Lab 3 – INTRODUCTION

Thank you for choosing to participate in the CLEVER Milano 2020 survey, foreseen within the European CLEVER Cities project (<https://clevercities.eu/>).

The new Tibaldi railway stop (see: <https://milanoclever.net/cal-3/>) will be constructed using Nature Based Solutions (NBS), innovative natural intervention such as: green walls, shaded areas, native flower meadows on the edge of the railway, etc.. This is the first innovative experimental design of a railway infrastructure integrated with green elements. The aim is to evaluate the environmental effects of this approach and also positive impacts for citizens who will frequent the area, as well as the possibility of replicating this experience in other contexts. The introduction of NBS in the railway stop also offers the opportunity to engage both the inhabitants of the neighborhood and travelers in the management of shared spaces. The questionnaire is completely anonymous, and no personal data will be collected. It takes about 15/20 minutes to complete the questionnaire. If you want more information, if you are interested in our activities, we invite you to follow the project by subscribing to the Clever Cities Milano mailing-list: <https://mailchi.mp/82648a63663c/clevermailinglist>

### SECTION 1

#### Tibaldi District - relationships, perceptions and liking

In this section, we'd like to discover something about you and your perception of the Tibaldi neighborhood. Your responses must refer to the COVID-19 pre-emergency period.

##### 1. Your relationship with the Tibaldi district (you can select multiple answers)

- ☐ I live in this neighborhood
- ☐ I visit the neighborhood for personal reasons (family, friends, ...)
- ☐ I work or study in the neighborhood
- ☐ I represent an organization/association/group operating in the neighborhood
- ☐ I do physical activity (sports, play, fitness...)
- ☐ I take care of the elderly or children
- ☐ I do socialize activities: spending time with friends, picnics
- ☐ I do gardening
- ☐ I relax in nature
- ☐ I carry out cultural activities: musical events, theater
- ☐ I dedicate to art and craftsmanship
- ☐

2. How strong do you feel your belonging to Tibaldi district?

- ☐ Very strongly
- ☐ Fairly strong
- ☐ Neutral/moderate
- ☐ A little bit strongly
- ☐ Not at all

3. In the last year, before the COVID-19 emergency, How often do you frequent the following places located in the Tibaldi district?

|                                                           | Never                 | Rarely                | Monthly               | Weekly                | Daily                 |
|-----------------------------------------------------------|-----------------------|-----------------------|-----------------------|-----------------------|-----------------------|
| Groceries (Baker/butcher/small shop                       | <input type="radio"/> |
| Bar                                                       | <input type="radio"/> |
| Restaurants                                               | <input type="radio"/> |
| Public parks                                              | <input type="radio"/> |
| Public squares                                            | <input type="radio"/> |
| Other meeting spaces (clubs/oratories/associations, etc.) | <input type="radio"/> |
| Cultural activities                                       | <input type="radio"/> |

4. How often do you chat with people who live in the neighborhood, expect saying hello?

- ☐ Every days
- ☐ Weekly
- ☐ Monthly
- ☐ Sporadically
- ☐ Never

5. Do you carry out activities in collaboration with people who live in the neighborhood?

- ☐ Every days
- ☐ Weekly
- ☐ Monthly
- ☐ Sporadically
- ☐ Never

6. About your relationship with the people living in the neighborhood, how much do you agree or disagree with the following statements?

[illegible]

7. How satisfied are you with the following characteristics of the Tibaldi district?

|                                                               | Very<br>satisfied     | Satisfied             | Neutral               | Not<br>satisfied      | Not satisfied<br>at all | I don't know/ I prefer<br>not to answer |
|---------------------------------------------------------------|-----------------------|-----------------------|-----------------------|-----------------------|-------------------------|-----------------------------------------|
| Environment and landscape                                     | <input type="radio"/>   | <input type="radio"/>                   |
| Buildings' aesthetics                                         | <input type="radio"/>   | <input type="radio"/>                   |
| The neighborhood in general                                   | <input type="radio"/>   | <input type="radio"/>                   |
| Public services                                               | <input type="radio"/>   | <input type="radio"/>                   |
| Transport and logistics                                       | <input type="radio"/>   | <input type="radio"/>                   |
| Economic accessibility and<br>convenience of service (prices) | <input type="radio"/>   | <input type="radio"/>                   |
| Maintenance and cleaning                                      | <input type="radio"/>   | <input type="radio"/>                   |
| Safety and security                                           | <input type="radio"/>   | <input type="radio"/>                   |

## SECTION 2

### Green areas in your neighborhood

By urban green areas we mean parks and gardens within the city

8.How important is greenery to you (green areas, trees, flower beds, etc.), in your life?

- ☐ Very important
- ☐ Important
- ☐ Indifferent
- ☐ Not very important
- ☐ For nothing

9.Were you aware of the CLEVER Cities project before receiving this questionnaire?

- ☐ Yes
- ☐ No

10.Do you know any of the innovative green solutions proposed by CLEVER Cities? If yes, which ones?

11.Are you generally aware of examples of innovative green solutions in general? Which ones?

12.How much do you agree or disagree with the following statements? I think urban greenery has a positive effect on ...

|                                                                     | Strongly<br>disagreed | Disagree              | Neither agree<br>or disagree | Agree                 | Strongly<br>agree     | I don't know/ I<br>prefer not to<br>answer |
|---------------------------------------------------------------------|-----------------------|-----------------------|------------------------------|-----------------------|-----------------------|--------------------------------------------|
| Presence of animals and plants of different species (biodiversity)  | <input type="radio"/> | <input type="radio"/> | <input type="radio"/>        | <input type="radio"/> | <input type="radio"/> | <input type="radio"/>                      |
| Air quality                                                         | <input type="radio"/> | <input type="radio"/> | <input type="radio"/>        | <input type="radio"/> | <input type="radio"/> | <input type="radio"/>                      |
| Noise pollution                                                     | <input type="radio"/> | <input type="radio"/> | <input type="radio"/>        | <input type="radio"/> | <input type="radio"/> | <input type="radio"/>                      |
| Perceived temperature during summer and thermal comfort in the area | <input type="radio"/> | <input type="radio"/> | <input type="radio"/>        | <input type="radio"/> | <input type="radio"/> | <input type="radio"/>                      |
| Aesthetics of neighborhoods and buildings                           | <input type="radio"/> | <input type="radio"/> | <input type="radio"/>        | <input type="radio"/> | <input type="radio"/> | <input type="radio"/>                      |
| Citizens well-being                                                 | <input type="radio"/> | <input type="radio"/> | <input type="radio"/>        | <input type="radio"/> | <input type="radio"/> | <input type="radio"/>                      |
| Citizens' health                                                    | <input type="radio"/> | <input type="radio"/> | <input type="radio"/>        | <input type="radio"/> | <input type="radio"/> | <input type="radio"/>                      |
| Social relationships between people and social cohesion             | <input type="radio"/> | <input type="radio"/> | <input type="radio"/>        | <input type="radio"/> | <input type="radio"/> | <input type="radio"/>                      |
| Recreational, educational and cultural activities                   | <input type="radio"/> | <input type="radio"/> | <input type="radio"/>        | <input type="radio"/> | <input type="radio"/> | <input type="radio"/>                      |
| Citizens' relationship with nature                                  | <input type="radio"/> | <input type="radio"/> | <input type="radio"/>        | <input type="radio"/> | <input type="radio"/> | <input type="radio"/>                      |

13. Are you in favor of creating shared and co-managed green spaces\* in the Tibaldi district?

\* "Co-management" means joint different actors (public and private) to manage public space .

- ☐ Very favourable
- ☐ Favourable
- ☐ Indifferent
- ☐ Against
- ☐ Very contrary

14. Why?

### SECTION 3

#### Tibaldi stop and innovative green solutions

15. How much do you think the improvement of transport services in the Tibaldi district is priority?

- ☐ Not a priority
- ☐ Low priority
- ☐ Medium priority
- ☐ High priority
- ☐ I don't know/ I prefer not to answer

16. Before receiving this questionnaire, Were you aware ...

|                                                                                                                                                                                                           | Yes                   | No                    | I don't know/ I prefer not to answer |
|-----------------------------------------------------------------------------------------------------------------------------------------------------------------------------------------------------------|-----------------------|-----------------------|--------------------------------------|
| ... of the project of a new railway stop in the Tibaldi district connected with the stations of San Cristoforo, Romolo, Porta Romana, Lambrate, Greco and with other stations of the Milanese hinterland? | <input type="radio"/> | <input type="radio"/> | <input type="radio"/>                |
| .... that the design of the new railway stop includes elements of innovative greenery                                                                                                                     | <input type="radio"/> | <input type="radio"/> | <input type="radio"/>                |

17. What reaction does the construction of a new green railway stop in the Tibaldi district arouse you?

- ☐ Very positive
- ☐ Positive
- ☐ Indifferent
- ☐ Worried
- ☐ Very worried

18. Why?

19. What do you think about the effects of the new stop in the Tibaldi district?

- ☐ It can bring many benefits
- ☐ It can bring some benefits
- ☐ Neutral
- ☐ It can create some problems
- ☐ It can create a lot of problems
- ☐ I don't know/ I prefer not to answer

20. What do you think about the effects of the stop on the following aspects?

|                                  | It can create a lot<br>of problems | It can create<br>some problems | Neutral               | It can bring<br>some benefits | It can bring<br>many benefits | I don't know/ I<br>prefer not to<br>answer |
|----------------------------------|------------------------------------|--------------------------------|-----------------------|-------------------------------|-------------------------------|--------------------------------------------|
| Urban decorum                    | <input type="radio"/>              | <input type="radio"/>          | <input type="radio"/> | <input type="radio"/>         | <input type="radio"/>         | <input type="radio"/>                      |
| Improving<br>connections         | <input type="radio"/>              | <input type="radio"/>          | <input type="radio"/> | <input type="radio"/>         | <input type="radio"/>         | <input type="radio"/>                      |
| Reducing air<br>pollution        | <input type="radio"/>              | <input type="radio"/>          | <input type="radio"/> | <input type="radio"/>         | <input type="radio"/>         | <input type="radio"/>                      |
| Real estate<br>reevaluation      | <input type="radio"/>              | <input type="radio"/>          | <input type="radio"/> | <input type="radio"/>         | <input type="radio"/>         | <input type="radio"/>                      |
| Increased social<br>interactions | <input type="radio"/>              | <input type="radio"/>          | <input type="radio"/> | <input type="radio"/>         | <input type="radio"/>         | <input type="radio"/>                      |

21. Did you participate to the project presentation event last December 18<sup>th</sup> 2019?

- ☐ Yes
- ☐ No

22. The Tibaldi train stop will include green walls. Do you know what it is?

- ☐ Yes
- ☐ No



|                | Strongly<br>disagreed | Disagree              | Neither agree<br>or disagree | Agree                 | Strongly<br>agree     | I don't know/ I<br>prefer not to<br>answer |
|----------------|-----------------------|-----------------------|------------------------------|-----------------------|-----------------------|--------------------------------------------|
| Economic value | <input type="radio"/> | <input type="radio"/> | <input type="radio"/>        | <input type="radio"/> | <input type="radio"/> | <input type="radio"/>                      |

25. What aspects do you think priority in the design of the new stop?

|                              | Strongly disagreed    | Disagree              | Neither agree or disagree | Agree                 | Strongly agree        |
|------------------------------|-----------------------|-----------------------|---------------------------|-----------------------|-----------------------|
| Shadow area                  | <input type="radio"/> | <input type="radio"/> | <input type="radio"/>     | <input type="radio"/> | <input type="radio"/> |
| Relax area                   | <input type="radio"/> | <input type="radio"/> | <input type="radio"/>     | <input type="radio"/> | <input type="radio"/> |
| Green space                  | <input type="radio"/> | <input type="radio"/> | <input type="radio"/>     | <input type="radio"/> | <input type="radio"/> |
| Urban furniture's aesthetics | <input type="radio"/> | <input type="radio"/> | <input type="radio"/>     | <input type="radio"/> | <input type="radio"/> |
| Spaces for sociality         | <input type="radio"/> | <input type="radio"/> | <input type="radio"/>     | <input type="radio"/> | <input type="radio"/> |
| People's safety              | <input type="radio"/> | <input type="radio"/> | <input type="radio"/>     | <input type="radio"/> | <input type="radio"/> |

26. Which aspects do you consider most relevant aspects for you to feel safe in a public area?

|                                                                        | Very<br>relevant      | Relevant              | Neutral               | Not very<br>relevant  | Not at all<br>relevant |
|------------------------------------------------------------------------|-----------------------|-----------------------|-----------------------|-----------------------|------------------------|
| Lighting                                                               | <input type="radio"/>  |
| Accessibility (pedestrian, cycle, etc.)                                | <input type="radio"/>  |
| Maintenance status of the area                                         | <input type="radio"/>  |
| Aesthetic quality                                                      | <input type="radio"/>  |
| Presence of people                                                     | <input type="radio"/>  |
| Presence of green space                                                | <input type="radio"/>  |
| Presence of security personnel (law enforcement, private surveillance) | <input type="radio"/>  |

27.What risks do you think could be in the new public space?

|                      | High                  | Low                   | As in other<br>places | Poor                  | Null                  |
|----------------------|-----------------------|-----------------------|-----------------------|-----------------------|-----------------------|
| Vandalism            | <input type="radio"/> |
| Crime                | <input type="radio"/> |
| State of abandonment | <input type="radio"/> |
| Reduced visibility   | <input type="radio"/> |
| Degradation          | <input type="radio"/> |

#### SECTION 4

### PERSONAL DATA

28.Indicate gender

- ☐ Female
- ☐ Male
- ☐ Other
- ☐ I'd rather not say it

29.Age group

- ☐ 16-24
- ☐ 25-34
- ☐ 35-49
- ☐ 50-64
- ☐ 65-79
- ☐ I prefer not to answer

30.Do you have children? In what age group?

- ☐ No children
- ☐ 0-5 years
- ☐ 5-10 years old
- ☐ 10-13 years old
- ☐ 13-18 years old
- ☐ Over the age of 18

31.Occupazione

- ☐ Unemployed

- ☐ Employee or self-employed/ freelancer without employees
- ☐ Self-employed with employees
- ☐ Not working / retired
- ☐ Household
- ☐ Not working - Sick or long-term disabled person
- ☐ Student (full-time or part-time)
- ☐ I prefer not to answer
- ☐

### 32.Higher level of education obtained

- ☐ PhD
- ☐ University Degree
- ☐ High school diploma
- ☐ Middle school
- ☐ Primary school
- ☐ No educational qualifications
- ☐ I prefer not to answer

### 33.Place of residence

### 34. Approximately how long have you lived/worked/attended the Tibaldi district?

- ☐ Less than 6 months
- ☐ Less than 1 year old
- ☐ Less than 5 years
- ☐ more than 5 years

## SECTION 5

### Information and involvement on the Tibaldi stop

35.Would you be interested in participating in the design, construction or management of the green spaces of the new Tibaldi stop?

Interested      Not interested      I don't know/ I prefer not to answer

I would like to be more informed about the green spaces and green walls of the new stop

☐
☐
☐

Interested      Not interested      I don't know/ I prefer not to answer

I am interested in co- design the green space of the new Tibaldi stop

☐☐☐

I would be willing to cooperate in the management of the green space and green walls outside the stop

☐☐☐
