# Supplementary material for: Setting the Social Monitoring Framework for Nature-Based Solutions Impact: Methodological Approach and Pre-Greening Measurements in the Case Study from CLEVER Cities Milan
Source: MDPI journal article supplement (doi:10.3390/su13179672), 2021-08-27
Supplement: s1 [file s1]

| Which challenge?            |                        |                      | How to assess/calculate the challenge?                         |                                                                                                                                                                                                                                                                                                                                                                  |                              |                                                       |                                                                                                                                                                                                                                                                                                                                                                                                  |                                                       | FR Cities CALs             |           |            |                |
|-----------------------------|------------------------|----------------------|----------------------------------------------------------------|------------------------------------------------------------------------------------------------------------------------------------------------------------------------------------------------------------------------------------------------------------------------------------------------------------------------------------------------------------------|------------------------------|-------------------------------------------------------|--------------------------------------------------------------------------------------------------------------------------------------------------------------------------------------------------------------------------------------------------------------------------------------------------------------------------------------------------------------------------------------------------|-------------------------------------------------------|----------------------------|-----------|------------|----------------|
| CHALLENGES /objectives      |                        |                      | SPECIFIC TOPIC                                                 | Indicator - Description of metrics' assesment methodology                                                                                                                                                                                                                                                                                                        | Unit                         | Tools/models (if required)                            | Data requirements                                                                                                                                                                                                                                                                                                                                                                                | Data source and availability                          | Sample time Data intervals | MILAN     |            |                |
| Citizen Safety and Security | physical environmental | real (direct)        | flooding risk assessment exposure (average/year)               | total rainfall volume/total water detention time                                                                                                                                                                                                                                                                                                                 |                              | Flood peak reduction                                  | GIS Mapping                                                                                                                                                                                                                                                                                                                                                                                      | floods records                                        |                            | CAL 1: GR |            |                |
|                             |                        |                      | static analysis of Green Roofs                                 | For a green roof, wall or facade, the loads that the building structure must support include:<br>-Dead load<br>- Live load<br>- Transient load                                                                                                                                                                                                                   | Weight loading (kg/m2)       |                                                       | GIS Mapping                                                                                                                                                                                                                                                                                                                                                                                      |                                                       |                            | CAL 1: GR |            |                |
|                             |                        |                      | Run-off                                                        | Runoff Coefficient and peaks: Crucial to measure rainfall at high resolution throughout the duration of the project, irrespective of runoff method, For direct measurment of runoff - high resolution data logging - possibly 15 min intervals, important to gather information of site conditions before AND after greening (e.g. infiltration rate, soil type) | Measures or Modeling         |                                                       | Direct measurement of runoff, USDA Curve Number . Unit = mm, Rational Method for estimating 'peak' flow rates for simple urban watersheds/sewers. Units = m3/s or litres/s, Statistical estimation of 'peak' runoff rates for return periods of 5,10,100 years Units = litres/s or m3/s, Process-based hydraulic modelling. Units = various, Rainfall. Standard guage method - logged. Unit = mm |                                                       |                            | CAL 1: GR |            | CAL 3: TIBALDI |
|                             |                        |                      | noise                                                          | day/evening/night noise level Directive 2002/49/EC of the European Parliament and of the Council of 25 June 2002                                                                                                                                                                                                                                                 | Measures or Modelling        | effect of noise on health                             | dBA (Average data of the days that have been measured. Annual average in the case of the acoustic simulation.)                                                                                                                                                                                                                                                                                   |                                                       | Lnight                     | CAL 1: GR |            | CAL 3: TIBALDI |
|                             |                        |                      |                                                                |                                                                                                                                                                                                                                                                                                                                                                  |                              |                                                       |                                                                                                                                                                                                                                                                                                                                                                                                  |                                                       | Lden                       |           |            |                |
|                             |                        |                      | urban heat island                                              | thermal comfort score                                                                                                                                                                                                                                                                                                                                            |                              | outdoor index.                                        | analysis of tropical nights, heat stresses,                                                                                                                                                                                                                                                                                                                                                      | temperature measurement (morning, night, differences) |                            |           | CAL 2: GIA |                |
|                             |                        |                      | traffic safety                                                 | accidents / crossings                                                                                                                                                                                                                                                                                                                                            |                              |                                                       |                                                                                                                                                                                                                                                                                                                                                                                                  |                                                       |                            |           | CAL 2: GIA | CAL 3: TIBALDI |
|                             |                        |                      | air quality                                                    | Non-spatial indicators of gross quantities: annual amount of pollutants captured/removed by vegetation                                                                                                                                                                                                                                                           |                              | measures of PM10, NO2                                 | concentration of pollutants                                                                                                                                                                                                                                                                                                                                                                      | yearly mortality because of air problems              |                            |           |            | CAL 3: TIBALDI |
|                             |                        | perceived (indirect) | thermal comfort                                                | estimation based on coefficients of plants used reduction capacity                                                                                                                                                                                                                                                                                               |                              | community walks                                       |                                                                                                                                                                                                                                                                                                                                                                                                  |                                                       |                            |           |            | CAL 3: TIBALDI |
|                             |                        |                      | urban design features                                          | heights of trees/vegetation density/visibility index                                                                                                                                                                                                                                                                                                             | number of blind walls        | observations                                          | urban design experts                                                                                                                                                                                                                                                                                                                                                                             |                                                       |                            |           |            |                |
|                             |                        |                      | Social co-benefits                                             | qualitative assessment of user attachment to user preferences on green/blue areas                                                                                                                                                                                                                                                                                | qualitative index            | mapping / surveys /economic valuation                 | place-based values and sense of belonging in community members                                                                                                                                                                                                                                                                                                                                   | PSI                                                   |                            |           |            | CAL 3: TIBALDI |
|                             | Social                 | real (direct)        | crime in vicinity                                              | Number and types of crime committed in the demonstration area per inhabitant OR use                                                                                                                                                                                                                                                                              |                              | Crime statistics (segregated by type and time of day) | stata                                                                                                                                                                                                                                                                                                                                                                                            |                                                       |                            |           |            | CAL 3: TIBALDI |
|                             |                        |                      | accessibility of green public spaces                           | accessibility index (measured as distance or time) of urban green spaces for population                                                                                                                                                                                                                                                                          | index                        | number of users/time                                  | gis mapping /neighboring analysis                                                                                                                                                                                                                                                                                                                                                                | surveys                                               |                            | CAL 1: GR | CAL 2: GIA | CAL 3: TIBALDI |
|                             |                        |                      | sociability of public spaces                                   | Number of people using the space during day/night                                                                                                                                                                                                                                                                                                                | activities +tracking methods | PSI/Place standards Observations /surveys             | quantitative/qualitative                                                                                                                                                                                                                                                                                                                                                                         |                                                       |                            |           |            |                |
|                             |                        |                      | Devices contributing to safety                                 | Self reporting instruments to assess indicators of literacy, numeracy and perceived levels of crime and safety.                                                                                                                                                                                                                                                  |                              | surveys                                               |                                                                                                                                                                                                                                                                                                                                                                                                  | EKLIPSE                                               |                            |           | CAL 2: GIA |                |
|                             |                        | perceived (indirect) | social degradation                                             | quality of life / social structure in the area                                                                                                                                                                                                                                                                                                                   | socio-demographics           | eyes on streets                                       | social analysis to local residents per catchment area                                                                                                                                                                                                                                                                                                                                            | statistics                                            |                            |           |            | CAL 3: TIBALDI |
|                             |                        |                      | poor maintenance to green spaces / management of public spaces | number of maintenance events on ground to NBS / falling trees                                                                                                                                                                                                                                                                                                    |                              | community groups                                      | community engagement in associations                                                                                                                                                                                                                                                                                                                                                             |                                                       |                            |           | CAL 2: GIA |                |
|                             |                        |                      | perception of safety /sense of place                           | Residents' and area users' perceptions of safety                                                                                                                                                                                                                                                                                                                 |                              | Surveys/ interviews                                   | background on socio-demograhics                                                                                                                                                                                                                                                                                                                                                                  | census data                                           |                            |           | CAL 2: GIA | CAL 3: TIBALDI |
