# Supplementary material for: Setting the Social Monitoring Framework for Nature-Based Solutions Impact: Methodological Approach and Pre-Greening Measurements in the Case Study from CLEVER Cities Milan
Source: MDPI journal article supplement (doi:10.3390/su13179672), 2021-08-27
Supplement: s1 [file s1]

## **“Let’s design together” the green area of Giambellino 129 Street – perceptions and involvement**

INTRODUCTION. Thank you for having chosen to participate in CLEVER Milano 2020 survey, foreseen within the European CLEVER Cities project, in collaboration with the MILO.Lab Laboratory (AdP Lorenteggio).

You will answer questions concerning the Giambellino Lorenteggio district and the urban green areas. The survey is completely anonymous and no personal data will be collected.

The survey is divided into three parts:

- the first section, called "PERSONAL DATA", aims to collect non-sensitive information relating to the compiler user
- the second section, called "BASELINE", edited by the Eliante Cooperative and POLIMI, the entities who are in charge of data processing, aims to collect information on the quality of living in the neighborhood and on people's relationship with greenery in the city
- the third section, called "PARTICIPATIVE PATH", curated by MILO.lab, Lorenteggio Social Laboratory, aims to collect useful information for evaluating the path which has been taken and for setting up future participatory activities.

How to fill in the survey?

1. Most questions can be answered by placing a single cross in the box, or by writing down the answer.
2. Fill in all the questions.
3. You will need about 15-20 minutes to fill in the survey.

Once processed, the data related to "BASELINE" will be available on this site: <https://milanoclever.net>

If you want to stay informed about the project, you can visit the site [www.milolab.org](http://www.milolab.org) and <https://milanoclever.net/partecipa/>

If you are interested in our activities, we invite you to follow the project by subscribing to the Clever Cities Milan mailing list: <https://mailchi.mp/82648a63663c/clevermailinglist>

## PERSONAL DATA

1

Indicate gender

- ☐ Female
- ☐ Male
- ☐ Other
- ☐ I prefer not to answer

Age Range

- ☐ 16-24
- ☐ 25-34
- ☐ 35-49
- ☐ 50-64
- ☐ 65-79
- ☐ I prefer not to answer

3

Do you have children? In which age range?

- ☐ No children
- ☐ 0-5 years
- ☐ 5-10 years
- ☐ 10-13 years
- ☐ 13-18 years
- ☐ Over 18 years old

4

About your employment status, you are currently:

- ☐ Unemployed
- ☐ Employee or self-employed / freelancer without employees
- ☐ Self-employed with employees
- ☐ Not working / retired
- ☐ Household
- ☐ Not working – Sick or long-term disabled person
- ☐ Student (full or part time)
- ☐ I prefer not to answer
- ☐

Highest level of education obtained

- ☐ Ph.D / Master
- ☐ University degree
- ☐ High School Diploma
- ☐ Middle School
- ☐ Elementary School
- ☐ No educational qualifications
- ☐ I prefer not to answer

## BASELINE- The Giambellino Lorenteggio district

6

Please indicate what is your relationship with the Giambellino Lorenteggio district?

*You can choose multiple answers*

- ☐ I live in this neighbourhood
- ☐ I visit the neighbourhood for personal reasons (family, friends)
- ☐ I work or study in the neighbourhood
- ☐ I represent an organization/association/group operating in the neighbourhood
- ☐ I do physical activity (sport, play, fitness..)
- ☐ I take care of the elderly or children
- ☐ I have do socialize activities in the neighborhood (I spend time with friends, picnics, etc.)
- ☐ I frequent the green areas in the neighborhood
- ☐ I carry out cultural activities (musical events, theater)
- ☐ Other .....

7

How strong do you feel your belonging to the Giambellino Lorenteggio district?

*Think of the area just few minutes away from your home*

- ☐ Very strongly
- ☐ Fairly strong
- ☐ Neutral / moderate
- ☐ Not very strong
- ☐ Not at all

8

Approximately how long have you lived / worked / attended the Giambellino Lorenteggio district?

- ☐ Less than 6 months
- ☐ Less than 1 year
- ☐ Less than 5 years
- ☐ More than 5 years



|                                                                           | Strongly disagree     | Disagree              | Neither agree nor disagree | Agree                 | Strongly agree        | I don't know / I prefer not to answer |
|---------------------------------------------------------------------------|-----------------------|-----------------------|----------------------------|-----------------------|-----------------------|---------------------------------------|
| People around here are willing to help their neighbours                   | <input type="radio"/> | <input type="radio"/> | <input type="radio"/>      | <input type="radio"/> | <input type="radio"/> | <input type="radio"/>                 |
| People in this neighbourhood generally don't get along with each other    | <input type="radio"/> | <input type="radio"/> | <input type="radio"/>      | <input type="radio"/> | <input type="radio"/> | <input type="radio"/>                 |
| It is a place where people from different backgrounds get along well      | <input type="radio"/> | <input type="radio"/> | <input type="radio"/>      | <input type="radio"/> | <input type="radio"/> | <input type="radio"/>                 |
| People in this neighbourhood pull together (or collaborate) to improve it | <input type="radio"/> | <input type="radio"/> | <input type="radio"/>      | <input type="radio"/> | <input type="radio"/> | <input type="radio"/>                 |
| I am happy with my friendships and relationships                          | <input type="radio"/> | <input type="radio"/> | <input type="radio"/>      | <input type="radio"/> | <input type="radio"/> | <input type="radio"/>                 |
| I know people I feel comfortable asking for help at any time.             | <input type="radio"/> | <input type="radio"/> | <input type="radio"/>      | <input type="radio"/> | <input type="radio"/> | <input type="radio"/>                 |
| My relationships are as satisfying as I would like them to be             | <input type="radio"/> | <input type="radio"/> | <input type="radio"/>      | <input type="radio"/> | <input type="radio"/> | <input type="radio"/>                 |
| The neighbourhood is becoming too expensive.                              | <input type="radio"/> | <input type="radio"/> | <input type="radio"/>      | <input type="radio"/> | <input type="radio"/> | <input type="radio"/>                 |
| I intend to live in this neighbourhood for a long time                    | <input type="radio"/> | <input type="radio"/> | <input type="radio"/>      | <input type="radio"/> | <input type="radio"/> | <input type="radio"/>                 |

12

Overall, are you satisfied with the Giambellino Lorenteggio neighborhood?

- ☐ Completely dissatisfied
- ☐ Dissatisfied
- ☐ Neutral
- ☐ Satisfied
- ☐ Very satisfied
- ☐ I don't know / I prefer not to answer

13

How satisfied are you with the following characteristics of the Giambellino district?

|                                                              | Very<br>satisfied     | Satisfied             | Neutral               | Not<br>satisfied      | Not at all<br>satisfied | I don't<br>know / I<br>prefer not<br>to answer |
|--------------------------------------------------------------|-----------------------|-----------------------|-----------------------|-----------------------|-------------------------|------------------------------------------------|
| Environment and landscape                                    | <input type="radio"/>   | <input type="radio"/>                          |
| Buildings' aesthetics                                        | <input type="radio"/>   | <input type="radio"/>                          |
| The neighbourhood, in general                                | <input type="radio"/>   | <input type="radio"/>                          |
| Public services                                              | <input type="radio"/>   | <input type="radio"/>                          |
| Economic accessibility and convenience of<br>services prices | <input type="radio"/>   | <input type="radio"/>                          |
| Maintenance and cleaning                                     | <input type="radio"/>   | <input type="radio"/>                          |
| Safety and security                                          | <input type="radio"/>   | <input type="radio"/>                          |

## URBAN GREEN AREAS

By Urban green areas, we mean public parks and gardens withing the city:

14

How important is greenery (green areas, trees, flower beds, etc.) in your life?

- ☐ Very important
- ☐ Important
- ☐ Indifferent
- ☐ Not very important
- ☐ For nothing

15

To what extent do you agree or disagree with the following statements? I think urban greenery has a positive effect on...

|                                                                          | Strongly disagree     | Disagree              | Neither agree nor disagree | Agree                 | Strongly agree        | I don't know/I prefer not to answer |
|--------------------------------------------------------------------------|-----------------------|-----------------------|----------------------------|-----------------------|-----------------------|-------------------------------------|
| Presence of animals and plants of different species (biodiversity)       | <input type="radio"/> | <input type="radio"/> | <input type="radio"/>      | <input type="radio"/> | <input type="radio"/> | <input type="radio"/>               |
| Air quality                                                              | <input type="radio"/> | <input type="radio"/> | <input type="radio"/>      | <input type="radio"/> | <input type="radio"/> | <input type="radio"/>               |
| Noise pollution                                                          | <input type="radio"/> | <input type="radio"/> | <input type="radio"/>      | <input type="radio"/> | <input type="radio"/> | <input type="radio"/>               |
| Perceived Temperature during the summer and thermal comfort in this area | <input type="radio"/> | <input type="radio"/> | <input type="radio"/>      | <input type="radio"/> | <input type="radio"/> | <input type="radio"/>               |
| Aesthetics of neighborhoods and buildings                                | <input type="radio"/> | <input type="radio"/> | <input type="radio"/>      | <input type="radio"/> | <input type="radio"/> | <input type="radio"/>               |
| Citizens well-being                                                      | <input type="radio"/> | <input type="radio"/> | <input type="radio"/>      | <input type="radio"/> | <input type="radio"/> | <input type="radio"/>               |
| Citizens health                                                          | <input type="radio"/> | <input type="radio"/> | <input type="radio"/>      | <input type="radio"/> | <input type="radio"/> | <input type="radio"/>               |
| Social relationships between people and social cohesion                  | <input type="radio"/> | <input type="radio"/> | <input type="radio"/>      | <input type="radio"/> | <input type="radio"/> | <input type="radio"/>               |
| Recreational, educational, cultural activities                           | <input type="radio"/> | <input type="radio"/> | <input type="radio"/>      | <input type="radio"/> | <input type="radio"/> | <input type="radio"/>               |
| Relationship of citizens with nature                                     | <input type="radio"/> | <input type="radio"/> | <input type="radio"/>      | <input type="radio"/> | <input type="radio"/> | <input type="radio"/>               |

16

In the last year, before the COVID-19 emergency, how often did you spend time in the green areas (urban parks, gardens, etc.) of the city?

*in the previous spring / summer*

- ☐ Every day, even several times a day
- ☐ Weekly
- ☐ Monthly
- ☐ Sporadically
- ☐ Never

17

Before COVID-19, for which reason did you frequent the green areas of the city for?  
(here you can specify more than one answer)

- ☐ Let the children play
- ☐ Play sport
- ☐ Meet people (picnic, chatting and being in company)
- ☐ Enjoy fresh air

- ☐ Enjoying nature
- ☐ Carry out gardening activities
- ☐ Relaxing
- ☐ Walking the dog
- ☐ Artistic activities (arts, handcrafts, etc.)
- ☐ Cultural activities (music events, theater, etc.)
- Other .....

18

Which criteria do you follow in order to choose the green areas that you want to visit?

*(here you can specify more than one answer)*

- ☐ Proximity to home, work, school
- ☐ Equipment (games, sports, benches)
- ☐ Aesthetic quality
- ☐ Shaded areas availability
- ☐ Naturalistic aspects (plants and animals to observe)
- ☐ Cleanness
- ☐ Perception of safety and security
- ☐ Presence of dog areas
- ☐ Other .....

19

Considering the times, you frequent a green area in Milan City, how many of these do you choose to visit a green area located in Giambellino Lorenteggio?

- ☐ Always
- ☐ Most of the time
- ☐ Half the time
- ☐ Almost never
- ☐ Never

20

Are you satisfied of the green areas of Giambellino Lorenteggio district?

- ☐ Completely satisfied
- ☐ Satisfied
- ☐ Neutral / I don't know them
- ☐ Dissatisfied
- ☐ Very dissatisfied

21

How satisfied are you about the following characteristics of the green areas located in Giambellino Lorenteggio district?

|                                                  | Very satisfied        | Satisfied             | Neutral               | Dissatisfied          | not at all satisfied  |
|--------------------------------------------------|-----------------------|-----------------------|-----------------------|-----------------------|-----------------------|
| Quantity                                         | <input type="radio"/> |
| Accessibility                                    | <input type="radio"/> |
| Aesthetics                                       | <input type="radio"/> |
| Naturalistic aspects (plants/animals to observe) | <input type="radio"/> |
| Equipment (tables, benches, games, sport)        | <input type="radio"/> |
| Security                                         | <input type="radio"/> |
| Cleanness                                        | <input type="radio"/> |

22

Have you ever visited a shared garden in Milan, that is a green area managed and cared for by associations and citizens?

- ☐ Never
- ☐ Sometimes
- ☐ Regularly
- ☐ I don't know

23

Which aspects do you consider the most relevant to feel safe in a green area of the city?

|                                              | Very relevant         | Relevant              | Neutral               | Not very relevant     | Not at all relevant   |
|----------------------------------------------|-----------------------|-----------------------|-----------------------|-----------------------|-----------------------|
| Lighting                                     | <input type="radio"/> |
| Accessibility (pedestrian, cycle path, etc.) | <input type="radio"/> |
| Maintenance status of the area               | <input type="radio"/> |
| Aesthetic quality                            | <input type="radio"/> |

Very relevant   Relevant   Neutral   Not very relevant   Not at all relevant

Presence of people

☐ ☐ ☐ ☐ ☐

Presence of security personnel (law enforcement, private security)

☐ ☐ ☐ ☐ ☐

Presence of fences

☐ ☐ ☐ ☐ ☐

24

To what extent do you think these aspects concern green areas located in Giambellino Lorenteggio district?

High   Not that high   as in other places   Scarce   Null   I don't know/ I prefer not to answer

Vandalism

☐ ☐ ☐ ☐ ☐ ☐

Crime

☐ ☐ ☐ ☐ ☐ ☐

Abandonment status

☐ ☐ ☐ ☐ ☐ ☐

Physical Decay

☐ ☐ ☐ ☐ ☐ ☐

Visibility's reduction

☐ ☐ ☐ ☐ ☐ ☐

Risk of getting hurt

☐ ☐ ☐ ☐ ☐ ☐

25

Were you aware of CLEVER Cities project before receiving this questionnaire?

- ☐ Yes  
☐ No

26

Do you know any of the innovative green solutions proposed by CLEVER Cities? If yes, which ones?

27

Are you generally aware of examples of innovative green solutions? Which ones?

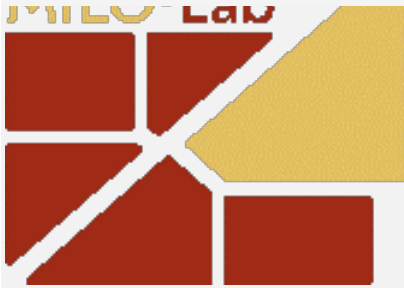

## SECTION III – PARTICIPATIVE PATHWAY

28

To what extent are you aware of the urban regeneration plan regarding the Giambellino Lorenteggio district?

- ☐ I know all the contents of the plan
- ☐ I know in detail some of the overall's plan projects
- ☐ I know the overall plan's contents in its general form
- ☐ I've heard of the overall plan, but I don't know its contents
- ☐ I have no knowledge of it

29

How important do you think the opportunity to actively participate in the developing/transformation choices of the district is?

- ☐ Very important
- ☐ Important
- ☐ Indifferent
- ☐ Not so important
- ☐ It doesn't matter

30

To what extent do you feel involved/interested in the regeneration project of the area around Lorenteggio 129 Street?

- ☐ Very involved/interested
- ☐ Involved/interested
- ☐ Not so involved/interested
- ☐ Not at all involved/interested
- ☐ Other

31

How did you find out the participatory path "Let's design together the green area of Giambellino 129 ?

(here you can select more than one answer)

- ☐ Information e-mail
- ☐ Posters
- ☐ Website
- ☐ By word of mouth
- ☐ Altro Other .....

32

What was your involvement in the participatory path "Let's design the green area of Giambellino 129 together"?

Please, specify in the box "Other" which one of the Workshops you attended among: 1<sup>st</sup> WS held on 18th September 2019, 2<sup>nd</sup> WS held on 28th September 2019, or 3<sup>rd</sup> held on 25th October 2019

- ☐ I have autonomously consulted the produced documentation published on-line
- ☐ I have received updates by e-mail
- ☐ I attended the organized workshop regarding the participatory path
- ☐

33

To what extent the participatory path "Let's design together the green area of Giambellino 129 Street" has allowed you to:

|                                                                              | A lot                 | Adequately            | Not much              | Not at all            | I don't know/ I prefer not to answer |
|------------------------------------------------------------------------------|-----------------------|-----------------------|-----------------------|-----------------------|--------------------------------------|
| Expressing your point of view                                                | <input type="radio"/>                |
| Getting knowledge of other participants' point of view                       | <input type="radio"/>                |
| Affecting the choices and decisions relating to the area's transformation    | <input type="radio"/>                |
| Networking with other people / realities                                     | <input type="radio"/>                |
| Obtaining information about the green area project of Giambellino 129 Street | <input type="radio"/>                |
| Obtaining information about the renovation's program of the -district        | <input type="radio"/>                |

I don't  
Not know/ I  
A Not at prefer not  
lot Adequatelymuch all to answer

Obtaining information about the initiatives and services of the MILO.Lab laboratory

☐ ☐ ☐ ☐ ☐

34

How do you judge the participatory path implemented up to now in relation to:

very                      Not so                      Not at all                      I don't know/I prefer  
effective   effective   effective   effective   not to answer

Objectives' clarity

☐ ☐ ☐ ☐ ☐

Clarity and completeness of the given information

☐ ☐ ☐ ☐ ☐

Openness to all citizens

☐ ☐ ☐ ☐ ☐

Ability to bring out different points of view and proposals

☐ ☐ ☐ ☐ ☐

Ability to summarize all the different contributions

☐ ☐ ☐ ☐ ☐

35

If you have any suggestions or advice on the participatory path write it here.

36

If you want to add something about the Giambellino Lorenteggio district or the green areas you can write it here.
